# Supplementary material for: Arabinose Plays an Important Role in Regulating the Growth and Sporulation of Bacillus subtilis NCD-2
Source: MDPI journal article supplement (doi:10.3390/ijms242417472), 2023-12-14
Supplement: s1 [file s1]

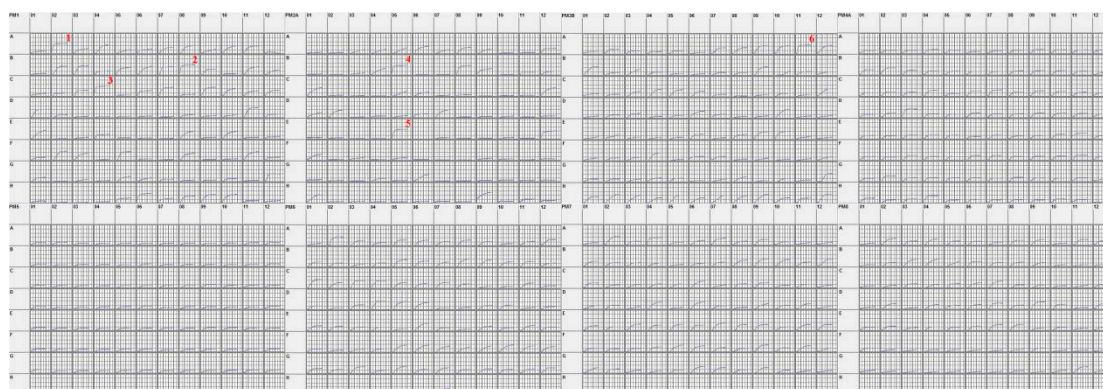

**Figure S1.** Growth kinetics of *B. subtilis* NCD-2 in the individual wells of PM1-8. The name of a plate is labeled in the upper left corner of each individual figure. The numbers 1-6 (red) indicate L-arabinose, D-xylose, D-ribose, D-arabinose, D-glucosamine and cysteine, respectively. A-H indicate the number of rows in a plate; 1-12 (black) indicate the number of columns in a plate. Each well displays time on the X-axis and redox signal intensity on the Y-axis.

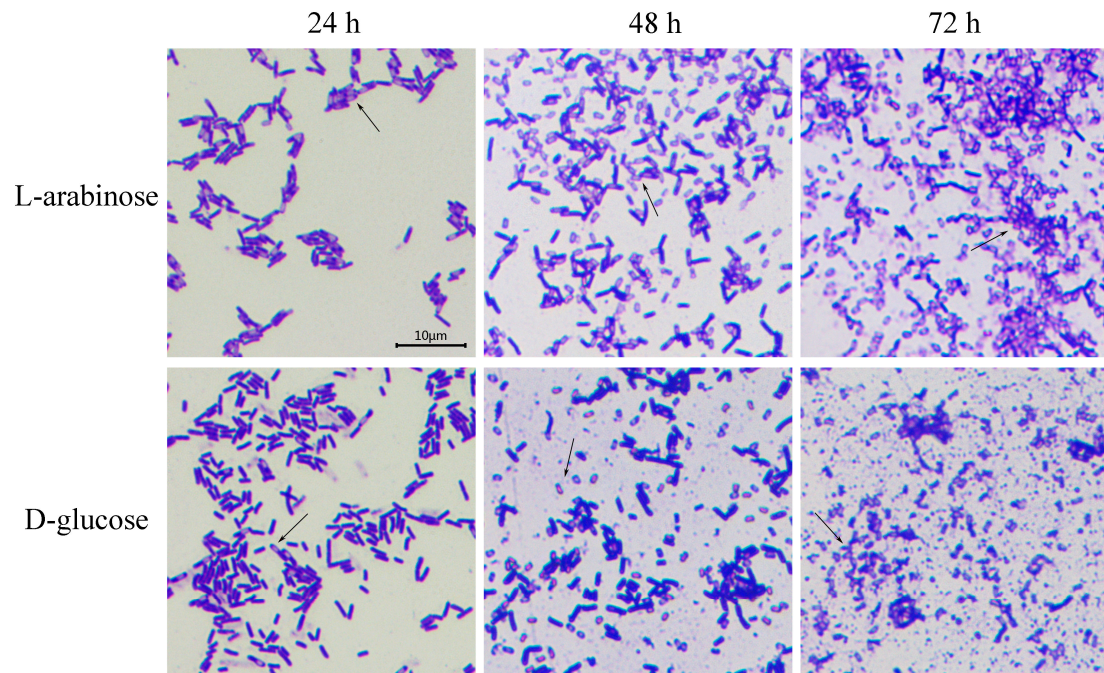

**Figure S2.** Proportion of spores of strain NCD-2 in M9 medium with L-arabinose/D-glucose as the carbon sources, at 24 h, 48 h and 72 h post-inoculation. The black arrows indicate spores formed by strain NCD-2 .

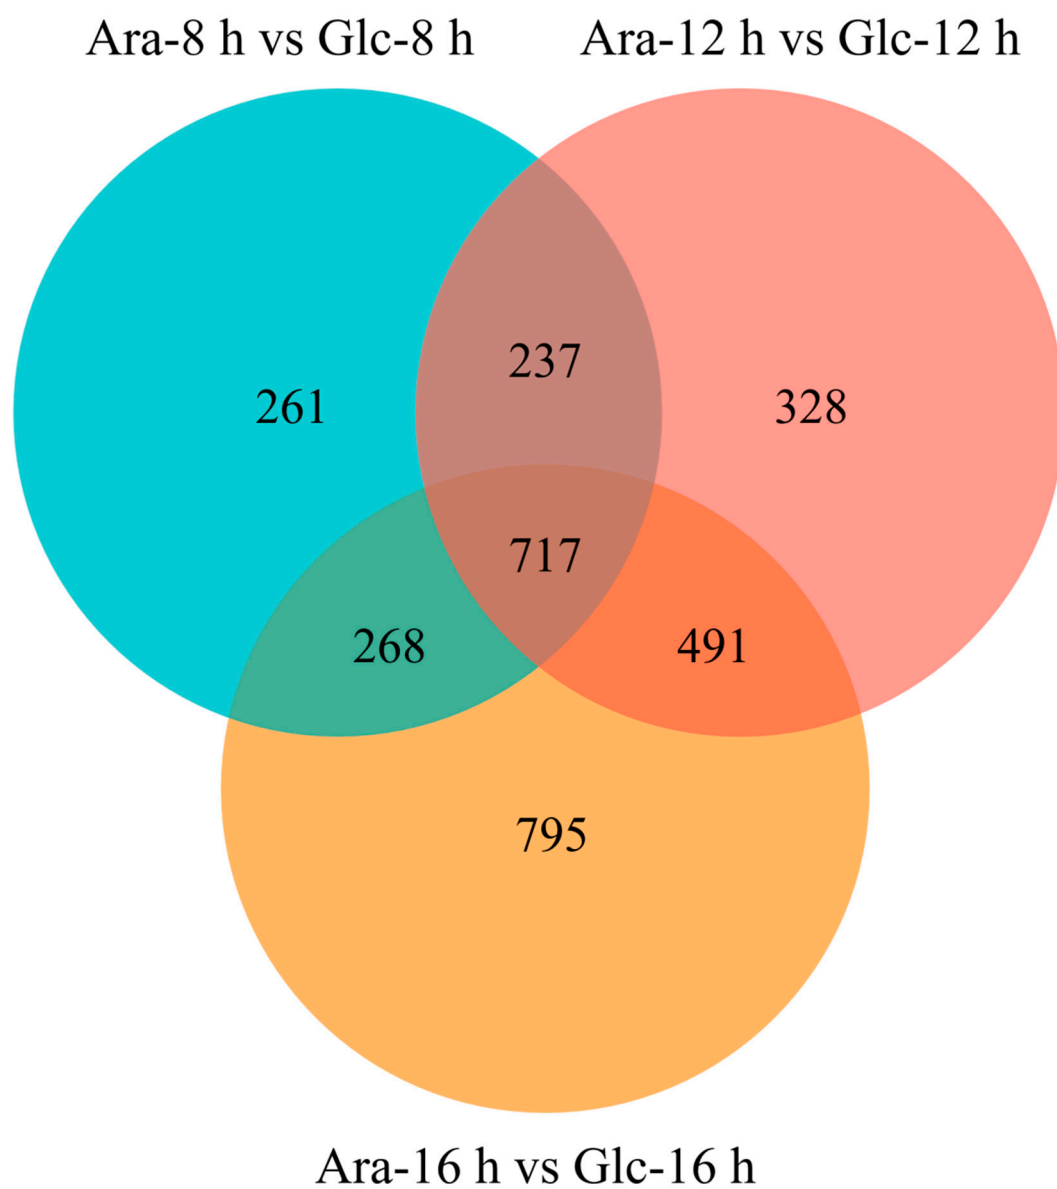

**Figure S3.** Venn diagrams depicting the numbers of shared differentially expressed genes (DEGs) in strain NCD-2 at 8 h, 12 h and 16 h of culture.

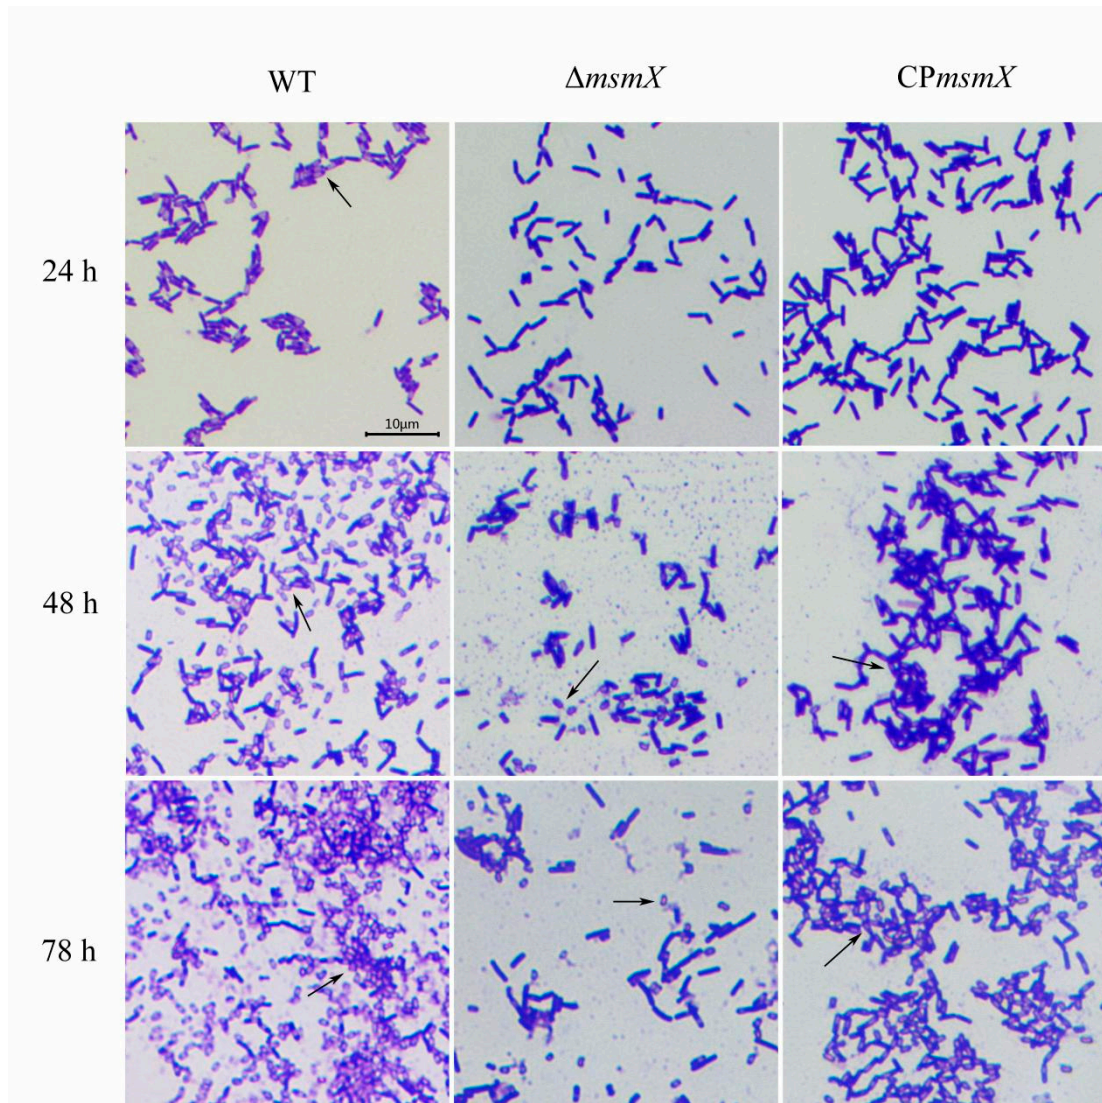

**Figure S4.** Proportion of spores of strain NCD-2 wild type (WT), *msmX*-null mutant ( $\Delta ms m X$ ) and its complemented strain ( $CP ms m X$ ) in M9 medium with L-arabinose as the carbon source, at 24 h, 48 h and 72 h post-inoculation.

**Table S1.** Verification of differently express genes by RT-qPCR

| Gene          | log <sub>2</sub> (Ara/Glc) (transcriptome) |       |                | log <sub>2</sub> (Ara/Glc) (RT-qPCR) |       |       |
|---------------|--------------------------------------------|-------|----------------|--------------------------------------|-------|-------|
|               | 8 h                                        | 12 h  | 16 h           | 8 h                                  | 12 h  | 16 h  |
| <i>cotY</i>   | 5.16                                       | 7.90  | 9.47           | 5.76                                 | 8.83  | 9.01  |
| <i>dpaA</i>   | 6.30                                       | 6.84  | 4.81           | 5.50                                 | 6.42  | 5.10  |
| <i>dpaB</i>   | 5.76                                       | 6.12  | 4.21           | 5.12                                 | 5.98  | 4.37  |
| <i>msmX</i>   | 2.96                                       | 1.35  | - <sup>a</sup> | 3.14                                 | 1.51  | -     |
| <i>sspA</i>   | 7.23                                       | 3.14  | 1.67           | 8.11                                 | 3.51  | 2.01  |
| <i>sspB</i>   | 7.40                                       | 3.43  | 2.66           | 7.71                                 | 3.25  | 3.05  |
| <i>tuaC</i>   | 1.65                                       | 1.12  | 5.15           | 1.78                                 | 1.35  | 4.82  |
| <i>spoIIQ</i> | 5.69                                       | 1.78  | -1.82          | 5.47                                 | 1.33  | -2.04 |
| <i>spo0E</i>  | -                                          | -1.75 | -1.93          | -                                    | -2.21 | -2.34 |
| <i>sdpC</i>   | -1.23                                      | -5.57 | -6.81          | -1.77                                | -6.08 | -7.71 |
| <i>leuA</i>   | -1.34                                      | -1.03 | -2.98          | -1.19                                | -1.28 | -3.22 |
| <i>ilvC</i>   | -1.45                                      | -1.36 | -3.80          | -1.73                                | -1.39 | -3.77 |
| <i>srfAA</i>  | -2.46                                      | -1.88 | -2.41          | -2.89                                | -1.79 | -2.50 |
| <i>ppsC</i>   | -3.00                                      | -4.75 | -4.66          | -3.25                                | -4.17 | -4.23 |

a: “-” means no significant difference in gene expression between L-arabinose (Ara) treatment and D-glucos (Glc) treatment



**Table S2.** Primers used in this study

| Primer           | Sequence (5' to 3')     | Function                  |
|------------------|-------------------------|---------------------------|
| <i>cotY</i> -F   | AAGGCGGATTGTTCTCCA      | qRT-PCR for <i>cotY</i>   |
| <i>cotY</i> -R   | TCTGGTGACAGGCACTGAAT    |                           |
| <i>dpaA</i> -F   | CAGGAGAAGGTGTCGTATCG    | qRT-PCR for <i>dpaA</i>   |
| <i>dpaA</i> -R   | TCATCCCGCTCAAACAGT      |                           |
| <i>dpaB</i> -F   | CGATTGTAAAGGCAGAACCT    | qRT-PCR for <i>dpaB</i>   |
| <i>dpaB</i> -R   | GAGATACCCAGAACGACAGG    |                           |
| <i>msmX</i> -F   | GACCTCTTTGCCGATGTAGC    | qRT-PCR for <i>msmX</i>   |
| <i>msmX</i> -R   | GGACGCCGAAGGATGTTTA     |                           |
| <i>sspA</i> -F   | ACTCAGGTAACAGCAACAACC   | qRT-PCR for <i>sspA</i>   |
| <i>sspA</i> -R   | TCCTCCAACAGAACCGTT      |                           |
| <i>sspB</i> -F   | TAACCTTGGAGCGGACACT     | qRT-PCR for <i>sspB</i>   |
| <i>sspB</i> -R   | TGCTGCTGAGCGAAAGAT      |                           |
| <i>tuaC</i> -F   | CGTAGGTTCTGCGTCAGTTG    | qRT-PCR for <i>tuaC</i>   |
| <i>tuaC</i> -R   | GATTCCTCTTTCGTCTCCTCA   |                           |
| <i>spoIIQ</i> -F | AAGAGAAAGAAGCAGCACTCG   | qRT-PCR for <i>spoIIQ</i> |
| <i>spoIIQ</i> -R | CGCTCAGAGAAGCAGAGACA    |                           |
| <i>Spo0E</i> -F  | AAGAGAAAGAAGCAGCACTCG   | qRT-PCR for <i>Spo0E</i>  |
| <i>Spo0E</i> -R  | CGCTCAGAGAAGCAGAGACA    |                           |
| <i>sdpC</i> -F   | CGATTGACAGCAAAGACCC     | qRT-PCR for <i>sdpC</i>   |
| <i>sdpC</i> -R   | GCATAAAGCCCACAAGATGG    |                           |
| <i>leuA</i> -F   | TTCGTGATGGTGAACAGTCC    | qRT-PCR for <i>leuA</i>   |
| <i>leuA</i> -R   | TCTTGCGATTTCCTGAACAG    |                           |
| <i>ilvC</i> -F   | CGGCGGATGTAGATGTATTCT   | qRT-PCR for <i>ilvC</i>   |
| <i>ilvC</i> -R   | GCTTTGTCTCTTGCTTCTCCA   |                           |
| <i>srfAA</i> -F  | CGGCGGATGTAGATGTATTCT   | qRT-PCR for <i>srfAA</i>  |
| <i>srfAA</i> -R  | GCTTTGTCTCTTGCTTCTCCA   |                           |
| <i>ppsC</i> -F   | TGATGCTCTATTGGTTGGA CTG | qRT-PCR for <i>ppsC</i>   |
| <i>ppsC</i> -R   | TAGCCCGATTCCGAAACA      |                           |
| <i>gyrB</i> -F   | GAAGCACGGACAATCACC      | reference gene            |
| <i>gyrB</i> -R   | TCCAAAGCACTCTTACGG      |                           |
